# Supplementary material for: The Rothmund-Thomson syndrome helicase RECQL4 is essential for hematopoiesis
Source: JCI journal article supplement (doi:10.1172/jci75334), 2014-06-23
Supplement: sd1 [file 1]

## Supplemental Materials and Methods

### Generation of *Recql4*<sup>fl/fl</sup> mice

The targeting vector was generated using BAC clones from the C57BL/6J RPCI-23 BAC library and was transfected into TaconicArtemis C57BL/6N Tac ES cell line. Gene targeting was performed in the TaconicArtemis C57BL/6N Tac ES cell line. Exons 9 and 10 were flanked by LoxP sites (size of loxP-flanked region: 1.0 kb) with a positive selection marker (Puromycin resistance - Puro<sup>R</sup>) flanked by F3 sites inserted into intron 8. Homologous recombinant clones were isolated using positive (Puro<sup>R</sup>) and negative (Thymidine kinase) selection. Positive clones were selected and expanded and screened by Southern blot for correct targeting events. A correctly targeted ES line was used to generate chimeras. Chimerism was measured in chimeras (G0) by coat color contribution of ES cells to the BALB/c host (black/white). Highly chimeric mice were bred to strain Flp-deleter C57BL/6 females (C57BL/6-*Tg*<sup>(CAG-Flpe)2</sup> *Arte*) (1). Once Flp recombination was confirmed the Flpe transgene was bred off the *Recql4*<sup>fl/fl</sup> line. Genotyping was performed by PCR using primers: 3303\_41: CACTCTAGAAGAGGGAGTCAGATGG and 3303\_42: ACAGCAACAGAACAGCAACTACG to yield products of 165bp for the WT and 325bp for the floxed allele. The deleted allele was detected by adding the primer CGCGCGAAAGCTGAGGAGTT to primers 3303\_41 and 3303\_42 to generate a 256bp product for the excised allele. All PCR products were sequence verified. We thank J Hartner (TaconicArtemis, Cologne, Germany) for advice on targeting strategy.

Germline deletion of *Recql4* was achieved by crossing *Recql4*<sup>fl/fl</sup> mice with *TNAP*-Cre (provided by K Matthaai, Australian National University, Canberra, Australia (2)).

### Histology

Tissue was collected and fixed immediately in 2-4% fresh paraformaldehyde. Immunohistochemistry was performed on paraffin sections of tibiae. Antigen-retrieval was undertaken using 10mM Citrate buffer pH 6.0 at 95°C for 10 min. After endogenous peroxidase and non-specific protein block [3% H<sub>2</sub>O<sub>2</sub>, 10% FCS, 10% Normal Horse Serum], anti-cleaved caspase 3 mAb (0.65µg/ml, Cell Signaling) was incubated overnight at 4°C. After secondary pAb (Polyclonal Swine Anti-Rabbit Immunoglobulins/Biotinylated Swine F(ab')<sub>2</sub> Dako) and streptavidin horseradish peroxidase incubation (SA-HRP, Dako), tyramide signal amplification (TSA, Perkin-Elmer) was used, followed again by SA-HRP incubation. Staining was developed with DAB+ [3'3' Diamino benzidine, Sigma) and briefly counterstained with Mayer's hematoxylin.

### Immunoblot

Rabbit polyclonal antibodies against murine *Recql4* were generated by GL Biochem (Shanghai) Ltd. The antibody that showed specific activity against over-expressed Flag-tagged m*Recql4* was used for western blotting. This antibody was raised against a peptide fragment spanning amino acids 74-93 (sequenced used QEPSCWGPHLSRAATQNTQS).

Western blots were performed on tumour material derived from *Osx-Cre p53<sup>fl/fl</sup> Recql4<sup>+/-</sup>* and *Osx-Cre p53<sup>fl/fl</sup> Recql4<sup>fl/fl</sup>* mice (to be described in detail elsewhere).

### ***In vitro* B and T cell assay after retroviral complementation**

LKS+ were isolated as previously described (3). Cells were cultured for 48 hours, infected as described in retroviral complementation section and then after 48 hours placed into B or T cell culture. For B or T cell cultures, 20,000 OP9 or OP9-DL1 cells/ml were plated in a 24-well plate 48 hours before infected LKS+ were added and cultured as described (4).

### **Flow Cytometric Analysis of Intracellular $\gamma$ H2AX (Phospho-Histone H2A.X<sup>Ser139</sup>) and Cell Cycle**

T and B cell precursors were collected from the co-cultures then fixed with 2% paraformaldehyde for 20 mins at RT. Cells were permeabilized with ice-cold methanol on ice, washed with PBS/BSA and resuspended in Alexa Fluor 647™ Rabbit anti- $\gamma$ H2AX antibody clone 20E3 (Cell Signaling). Cells were washed, resuspended in PBS containing 20  $\mu$ g/ml Propidium Iodide (PI) and 100  $\mu$ g/ml RNase A and analyzed by flow cytometry. Results were analyzed with FlowJo software Version 9.0 (Treestar).  $\gamma$ H2AX foci were visualized on a per cell basis using a laser scanning cytometer (Compucyte).

### **Analysis of Recql4 expression in murine megakaryocytes**

Raw CEL files downloaded from GEO (GSE6593) were processed in GenePattern using ExpressionFileCreator v7 (method = RMA, quantile normalization = yes, background correct = yes, compute present absent calls = yes, normalization method = median scaling). Probeset 1422922\_at (RECQL4) was not detected above background in any sample.

Raw CEL files downloaded from GEO (GSE49664) were processed in GenePattern using NormalizeAffymetrixST v 2.2 (algorithm = RMA, probesets = core, controls = include, chip = Affymetrix\_MoGene\_1\_0\_st\_v1.na33.2.mm9.transcript.chip). As P/M/A calls are not available we define a gene to be detected if its expression is greater than the median of the control probes, plus 1 s.d. Probeset 10430071 (Recql4) was detected in 3/4 HSC, 3/4 ERY and 0/4 MEG samples.

### **References:**

1. Buchholz, F., Angrand, P.O., and Stewart, A.F. 1998. Improved properties of FLP recombinase evolved by cycling mutagenesis. *Nat Biotechnol* 16:657-662.
2. Lomeli, H., Ramos-Mejia, V., Gertsenstein, M., Lobe, C.G., and Nagy, A. 2000. Targeted insertion of Cre recombinase into the TNAP gene: excision in primordial germ cells. *Genesis* 26:116-117.
3. Walkley, C.R., Fero, M.L., Chien, W.M., Purton, L.E., and McArthur, G.A. 2005. Negative cell-cycle regulators cooperatively control self-renewal and differentiation of haematopoietic stem cells. *Nat Cell Biol* 7:172-178.
4. Smeets, M.F., Chan, A.C., Dagger, S., Bradley, C.K., Wei, A., and Izon, D.J. 2013. Fli-1 overexpression in hematopoietic progenitors deregulates T cell development and induces pre-T cell lymphoblastic leukaemia/lymphoma. *PLoS One* 8:e62346.

Supplemental Table 1

AnnexinV and 7AAD data from Day 14 post tamoxifen in indicated populations within the bone marrow

All animals fed tamoxifen containing chow for 14 days

Control = R26-CreERT2 ki/+ Recq14fl/+ (n=3); KO = R26-CreERT2 ki/+ Recq14fl/fl (n=4)

Data expressed as mean +/- sem

| Population                | Annexin V+/7AAD- |               | Fold difference<br>(KO/WT) | T test | Annexin V+/7AAD+ |               | Fold difference<br>(KO/WT) | T test | AnnexinV-/7AAD+ |               | Fold difference<br>(KO/WT) | T test |
|---------------------------|------------------|---------------|----------------------------|--------|------------------|---------------|----------------------------|--------|-----------------|---------------|----------------------------|--------|
|                           | Control          | Recq14fl/fl   |                            |        | Control          | Recq14fl/fl   |                            |        | Control         | Recq14fl/fl   |                            |        |
| LT-HSC (LKS+CD150+CD105+) | 21.0 +/- 4.4     | 13.8 +/- 0.77 | 0.65                       | 0.114  | 21.5 +/- 2.8     | 21.1 +/- 4.35 | 0.98                       | 0.946  | 9.06 +/- 3.9    | 19.2 +/- 3.0  | 1.99                       | 0.104  |
| MPP (LKS+CD150-CD105-)    | 7.2 +/- 0.8      | 4.8 +/- 0.85  | 0.68                       | 0.118  | 14.7 +/- 1.2     | 21.3 +/- 2.86 | 1.45                       | 0.119  | 12.4 +/- 3.5    | 26.6 +/- 1.91 | 2.15                       | 0.012  |
| GMP                       | 2.3 +/- 0.4      | 2.8 +/- 0.6   | 1.22                       | 0.541  | 24.7 +/- 1.6     | 22.6 +/- 3.71 | 0.91                       | 0.667  | 14.4 +/- 4.0    | 20.0 +/- 1.68 | 1.38                       | 0.21   |
| MkP                       | 4.7 +/- 0.3      | 4.4 +/- 0.87  | 0.95                       | 0.842  | 24.9 +/- 0.6     | 25.2 +/- 3.56 | 1.01                       | 0.942  | 20.0 +/- 4.9    | 29.4 +/- 2.4  | 1.47                       | 0.084  |
| Pre-MegE                  | 5.6 +/- 0.9      | 4.7 +/- 0.89  | 0.84                       | 0.519  | 11.9 +/- 2.6     | 16.1 +/- 3.23 | 1.35                       | 0.383  | 5.5 +/- 1.7     | 18.2 +/- 2.44 | 3.31                       | 0.011  |
| Pre-CFU-E                 | 12.1 +/- 1.0     | 11.2 +/- 2.19 | 0.92                       | 0.753  | 1.3 +/- 0.8      | 1.5 +/- 0.54  | 1.18                       | 0.819  | 2.8 +/- 1.4     | 2.1 +/- 0.46  | 0.74                       | 0.3    |
| CFU-E                     | 11.3 +/- 2.3     | 9.3 +/- 2.09  | 0.82                       | 0.545  | 4.9 +/- 0.5      | 5.8 +/- 1.74  | 1.16                       | 0.718  | 5.1 +/- 1.9     | 8.7 +/- 2.4   | 1.7                        | 0.32   |
| Granulocytes              | 5.3 +/- 0.7      | 7.6 +/- 0.77  | 1.42                       | 0.92   | 1.9 +/- 0.3      | 3.4 +/- 0.32  | 1.79                       | 0.023  | 2.1 +/- 0.3     | 3.1 +/- 0.49  | 1.49                       | 0.172  |
| Monocytes/Macrophages     | 18.6 +/- 3.7     | 20.8 +/- 2.28 | 1.12                       | 0.616  | 4.4 +/- 0.9      | 6.7 +/- 1.31  | 1.54                       | 0.233  | 3.8 +/- 0.4     | 4.2 +/- 0.41  | 1.11                       | 0.527  |
| Erythroid                 |                  |               |                            |        |                  |               |                            |        |                 |               |                            |        |
| CD71+ Ter119+             | 5.6 +/- 0.9      | 6.6 +/- 1.6   | 1.19                       | 0.436  | 1.71 +/- 0.1     | 3.0 +/- 0.38  | 1.74                       | 0.039  | 2.4 +/- 0.7     | 2.6 +/- 0.56  | 1.1                        | 0.783  |
| CD71 mid Ter119+          | 7.7 +/- 1.4      | 8.6 +/- 0.98  | 1.13                       | 0.578  | 6.5 +/- 1.5      | 10.0 +/- 1.49 | 1.52                       | 0.172  | 2.9 +/- 0.6     | 3.5 +/- 0.59  | 1.2                        | 0.532  |
| CD71- Ter119+             | 1.2 +/- 0.0      | 1.2 +/- 0.1   | 0.97                       | 0.743  | 0.4 +/- 0.1      | 0.5 +/- 0.11  | 1.19                       | 0.651  | 0.2 +/- 0.0     | 0.2 +/- 0.03  | 1.15                       | 0.645  |
| B lymphoid                |                  |               |                            |        |                  |               |                            |        |                 |               |                            |        |
| Mature B (B220+IgM+)      | 22.6 +/- 2.8     | 18.4 +/- 1.96 | 0.81                       | 0.258  | 16.7 +/- 3.5     | 21.2 +/- 1.24 | 1.27                       | 0.226  | 1.9 +/- 0.4     | 2.1 +/- 0.54  | 1.14                       | 0.733  |
| PreProB                   | 17.6 +/- 2.2     | 18.2 +/- 2.27 | 1.03                       | 0.537  | 7.0 +/- 0.6      | 8.0 +/- 1.09  | 1.13                       | 0.537  | 1.0 +/- 0.3     | 1.6 +/- 0.45  | 1.6                        | 3.42   |
| ProB                      | 4.89 +/- 0.1     | 5.7 +/- 0.89  | 1.18                       | 0.441  | 1.4 +/- 0.1      | 3.3 +/- 0.49  | 2.4                        | 0.022  | 1.0 +/- 0.2     | 2.0 +/- 0.52  | 2.09                       | 0.165  |
| PreB                      | 25.9 +/- 0.9     | 27.4 +/- 2.55 | 1.06                       | 0.629  | 14.5 +/- 0.4     | 21.2 +/- 1.46 | 1.46                       | 0.012  | 14.5 +/- 0.4    | 1.9 +/- 0.47  | 1.38                       | 0.427  |
| T lymphoid                |                  |               |                            |        |                  |               |                            |        |                 |               |                            |        |
| CD4+ CD8-                 | 13.8 +/- 1.0     | 21.7 +/- 2.7  | 1.57                       | 0.069  | 5.6 +/- 0.3      | 7.1 +/- 1.05  | 1.26                       | 0.309  | 4.4 +/- 0.4     | 4.2 +/- 0.52  | 0.97                       | 0.872  |
| CD4- CD8+                 | 6.2 +/- 0.5      | 7.7 +/- 0.56  | 1.25                       | 0.147  | 15.5 +/- 2.2     | 24.9 +/- 3.96 | 1.61                       | 0.148  | 9.8 +/- 0.6     | 10.6 +/- 0.63 | 1.08                       | 0.495  |

Supplemental Table 2

Figure 5 Panel J All statistical tests done with Ordinary One-Way ANOVA with multiple comparison test using Prism software

|                                             |                  |                              |              |           |                                             |                  |                             |              |           |
|---------------------------------------------|------------------|------------------------------|--------------|-----------|---------------------------------------------|------------------|-----------------------------|--------------|-----------|
| <b>J Day 30 WBC count in PB</b>             |                  |                              |              |           | <b>Day 30 RBC count in PB</b>               |                  |                             |              |           |
| Tukey's multiple comparisons test           | Mean Diff.       | 95% CI of diff.              | Significant? | Summary   | Tukey's multiple comparisons test           | Mean Diff.       | 95% CI of diff.             | Significant? | Summary   |
| Recq4fl/+ vs. Recq4fl/fl                    | 4.493            | 2.373 to 6.613               | Yes          | ***       | Recq4fl/+ vs. Recq4fl/fl                    | 6.325            | 4.544 to 8.106              | Yes          | ***       |
| Recq4fl/+ vs. p53fl/fl                      | 0.8929           | -1.227 to 3.013              | No           | ns        | Recq4fl/+ vs. p53fl/fl                      | -0.025           | -1.806 to 1.756             | No           | ns        |
| Recq4fl/+ vs. Recq4fl/fl p53fl/fl           | 3.943            | 1.823 to 6.063               | Yes          | ***       | Recq4fl/+ vs. Recq4fl/fl p53fl/fl           | 4.725            | 2.944 to 6.506              | Yes          | ***       |
| Recq4fl/fl vs. p53fl/fl                     | -3.6             | -5.992 to -1.208             | Yes          | **        | Recq4fl/fl vs. p53fl/fl                     | -6.35            | -8.359 to -4.341            | Yes          | ***       |
| <b>Recq4fl/fl vs. Recq4fl/fl p53fl/fl</b>   | <b>-0.55</b>     | <b>-2.942 to 1.842</b>       | <b>No</b>    | <b>ns</b> | <b>Recq4fl/fl vs. Recq4fl/fl p53fl/fl</b>   | <b>-1.6</b>      | <b>-3.609 to 0.4094</b>     | <b>No</b>    | <b>ns</b> |
| p53fl/fl vs. Recq4fl/fl p53fl/fl            | 3.05             | 0.6584 to 5.442              | Yes          | *         | p53fl/fl vs. Recq4fl/fl p53fl/fl            | 4.75             | 2.741 to 6.759              | Yes          | ***       |
| <b>K BM cellularity</b>                     |                  |                              |              |           | <b>MPP</b>                                  |                  |                             |              |           |
| Tukey's multiple comparisons test           | Mean Diff.       | 95% CI of diff.              | Significant? | Summary   | Tukey's multiple comparisons test           | Mean Diff.       | 95% CI of diff.             | Significant? | Summary   |
| Recq4fl/+ vs. Recq4fl/fl                    | 9.208            | 5.738 to 12.68               | Yes          | ****      | Recq4fl/+ vs. Recq4fl/fl                    | 0.002083         | -0.01915 to 0.02332         | No           | ns        |
| Recq4fl/+ vs. p53fl/fl                      | -0.2167          | -3.687 to 3.254              | No           | ns        | Recq4fl/+ vs. p53fl/fl                      | 0.003558         | -0.01768 to 0.02480         | No           | ns        |
| Recq4fl/+ vs. Recq4fl/fl p53fl/fl           | 8.383            | 4.913 to 11.85               | Yes          | ****      | Recq4fl/+ vs. Recq4fl/fl p53fl/fl           | -0.01789         | -0.03913 to 0.003345        | No           | ns        |
| Recq4fl/fl vs. p53fl/fl                     | -9.425           | -13.23 to -5.623             | Yes          | ****      | Recq4fl/fl vs. p53fl/fl                     | 0.001475         | -0.02179 to 0.02474         | No           | ns        |
| <b>Recq4fl/fl vs. Recq4fl/fl p53fl/fl</b>   | <b>-0.825</b>    | <b>-4.627 to 2.977</b>       | <b>No</b>    | <b>ns</b> | <b>Recq4fl/fl vs. Recq4fl/fl p53fl/fl</b>   | <b>-0.01998</b>  | <b>-0.04324 to 0.003289</b> | <b>No</b>    | <b>ns</b> |
| p53fl/fl vs. Recq4fl/fl p53fl/fl            | 8.6              | 4.798 to 12.40               | Yes          | ****      | p53fl/fl vs. Recq4fl/fl p53fl/fl            | -0.02145         | -0.04471 to 0.001814        | No           | ns        |
| <b>L LT-HSC</b>                             |                  |                              |              |           | <b>B220+IgM- B cells</b>                    |                  |                             |              |           |
| Tukey's multiple comparisons test           | Mean Diff.       | 95% CI of diff.              | Significant? | Summary   | Tukey's multiple comparisons test           | Mean Diff.       | 95% CI of diff.             | Significant? | Summary   |
| Recq4fl/+ vs. Recq4fl/fl                    | 0.0001833        | -0.001116 to 0.001482        | No           | ns        | Recq4fl/+ vs. Recq4fl/fl                    | 1.414            | 0.2857 to 2.543             | Yes          | *         |
| Recq4fl/+ vs. p53fl/fl                      | 0.0007333        | -0.0005656 to 0.002033       | No           | ns        | Recq4fl/+ vs. p53fl/fl                      | -0.3462          | -1.475 to 0.7824            | No           | ns        |
| Recq4fl/+ vs. Recq4fl/fl p53fl/fl           | -0.0006417       | -0.001941 to 0.000657        | No           | ns        | Recq4fl/+ vs. Recq4fl/fl p53fl/fl           | 1.465            | 0.4352 to 2.496             | Yes          | **        |
| Recq4fl/fl vs. p53fl/fl                     | 0.00055          | -0.0008729 to 0.00197        | No           | ns        | Recq4fl/fl vs. p53fl/fl                     | -1.76            | -3.064 to -0.4573           | Yes          | **        |
| <b>Recq4fl/fl vs. Recq4fl/fl p53fl/fl</b>   | <b>-0.000825</b> | <b>-0.002248 to 0.000597</b> | <b>No</b>    | <b>ns</b> | <b>Recq4fl/fl vs. Recq4fl/fl p53fl/fl</b>   | <b>0.05116</b>   | <b>-1.168 to 1.270</b>      | <b>No</b>    | <b>ns</b> |
| p53fl/fl vs. Recq4fl/fl p53fl/fl            | -0.001375        | 0.002798 to 4.795e-00        | No           | ns        | p53fl/fl vs. Recq4fl/fl p53fl/fl            | 1.812            | 0.5926 to 3.031             | Yes          | **        |
| <b>M B220+IgM+ B cells</b>                  |                  |                              |              |           | <b>CD71midTer119+ erythroid cells in BM</b> |                  |                             |              |           |
| Tukey's multiple comparisons test           | Mean Diff.       | 95% CI of diff.              | Significant? | Summary   | Tukey's multiple comparisons test           | Mean Diff.       | 95% CI of diff.             | Significant? | Summary   |
| Recq4fl/+ vs. Recq4fl/fl                    | 0.6949           | 0.2097 to 1.180              | Yes          | **        | Recq4fl/+ vs. Recq4fl/fl                    | 0.007183         | -0.6453 to 0.6597           | No           | ns        |
| Recq4fl/+ vs. p53fl/fl                      | 0.04517          | -0.4400 to 0.5303            | No           | ns        | Recq4fl/+ vs. p53fl/fl                      | -0.5537          | -1.206 to 0.09885           | No           | ns        |
| Recq4fl/+ vs. Recq4fl/fl p53fl/fl           | 0.7489           | 0.3060 to 1.192              | Yes          | **        | Recq4fl/+ vs. Recq4fl/fl p53fl/fl           | 0.002358         | -0.6502 to 0.6549           | No           | ns        |
| Recq4fl/fl vs. p53fl/fl                     | -0.6497          | -1.210 to -0.08951           | Yes          | *         | Recq4fl/fl vs. p53fl/fl                     | -0.5609          | -1.276 to 0.1540            | No           | ns        |
| <b>Recq4fl/fl vs. Recq4fl/fl p53fl/fl</b>   | <b>0.05397</b>   | <b>-0.4701 to 0.5780</b>     | <b>No</b>    | <b>ns</b> | <b>Recq4fl/fl vs. Recq4fl/fl p53fl/fl</b>   | <b>-0.004825</b> | <b>-0.7196 to 0.7100</b>    | <b>No</b>    | <b>ns</b> |
| p53fl/fl vs. Recq4fl/fl p53fl/fl            | 0.7037           | 0.1797 to 1.228              | Yes          | **        | p53fl/fl vs. Recq4fl/fl p53fl/fl            | 0.956            | -0.1588 to 1.271            | No           | ns        |
| <b>N CD71+Ter119+ erythroid cells in BM</b> |                  |                              |              |           | <b>CD71-Ter119+ erythroid cells in BM</b>   |                  |                             |              |           |
| Tukey's multiple comparisons test           | Mean Diff.       | 95% CI of diff.              | Significant? | Summary   | Tukey's multiple comparisons test           | Mean Diff.       | 95% CI of diff.             | Significant? | Summary   |
| Recq4fl/+ vs. Recq4fl/fl                    | 3.497            | 1.847 to 5.148               | Yes          | ***       | Recq4fl/+ vs. Recq4fl/fl                    | 0.5287           | -0.9528 to 2.010            | No           | ns        |
| Recq4fl/+ vs. p53fl/fl                      | 0.5843           | -1.066 to 2.234              | No           | ns        | Recq4fl/+ vs. p53fl/fl                      | -2.275           | -3.757 to -0.7936           | Yes          | **        |
| Recq4fl/+ vs. Recq4fl/fl p53fl/fl           | 3.368            | 1.718 to 5.018               | Yes          | ***       | Recq4fl/+ vs. Recq4fl/fl p53fl/fl           | 0.4507           | -1.031 to 1.932             | No           | ns        |
| Recq4fl/fl vs. p53fl/fl                     | -2.913           | -4.721 to -1.105             | Yes          | **        | Recq4fl/fl vs. p53fl/fl                     | -2.804           | -4.427 to -1.181            | Yes          | ***       |
| <b>Recq4fl/fl vs. Recq4fl/fl p53fl/fl</b>   | <b>-0.1294</b>   | <b>-1.937 to 1.678</b>       | <b>No</b>    | <b>ns</b> | <b>Recq4fl/fl vs. Recq4fl/fl p53fl/fl</b>   | <b>-0.078</b>    | <b>-1.701 to 1.545</b>      | <b>No</b>    | <b>ns</b> |
| p53fl/fl vs. Recq4fl/fl p53fl/fl            | 2.784            | 0.9761 to 4.591              | Yes          | **        | p53fl/fl vs. Recq4fl/fl p53fl/fl            | 2.726            | 1.103 to 4.349              | Yes          | **        |
| <b>O Thymus Cellularity</b>                 |                  |                              |              |           | <b>CD4+CD8+</b>                             |                  |                             |              |           |
| Tukey's multiple comparisons test           | Mean Diff.       | 95% CI of diff.              | Significant? | Summary   | Tukey's multiple comparisons test           | Mean Diff.       | 95% CI of diff.             | Significant? | Summary   |
| Recq4fl/+ vs. Recq4fl/fl                    | 106.7            | 47.19 to 166.2               | Yes          | ***       | Recq4fl/+ vs. Recq4fl/fl                    | 91.66            | 48.37 to 134.9              | Yes          | ***       |
| Recq4fl/+ vs. p53fl/fl                      | -8.775           | -68.26 to 50.71              | No           | ns        | Recq4fl/+ vs. p53fl/fl                      | 16.94            | -26.34 to 60.22             | No           | ns        |
| Recq4fl/+ vs. Recq4fl/fl p53fl/fl           | 103.6            | 44.09 to 163.1               | Yes          | **        | Recq4fl/+ vs. Recq4fl/fl p53fl/fl           | 90.74            | 47.46 to 134.0              | Yes          | ***       |
| Recq4fl/fl vs. p53fl/fl                     | -115.5           | -178.2 to -52.75             | Yes          | ***       | Recq4fl/fl vs. p53fl/fl                     | -74.72           | -120.3 to -29.09            | Yes          | **        |
| <b>Recq4fl/fl vs. Recq4fl/fl p53fl/fl</b>   | <b>-3.1</b>      | <b>-65.80 to 59.60</b>       | <b>No</b>    | <b>ns</b> | <b>Recq4fl/fl vs. Recq4fl/fl p53fl/fl</b>   | <b>-0.9165</b>   | <b>-46.54 to 44.71</b>      | <b>No</b>    | <b>ns</b> |
| p53fl/fl vs. Recq4fl/fl p53fl/fl            | 112.4            | 49.65 to 175.1               | Yes          | ***       | p53fl/fl vs. Recq4fl/fl p53fl/fl            | 73.8             | 28.18 to 119.4              | Yes          | **        |
| <b>P Thymic subsets</b>                     |                  |                              |              |           | <b>CD8+</b>                                 |                  |                             |              |           |
| <b>CD4+</b>                                 |                  |                              |              |           | <b>CD8+</b>                                 |                  |                             |              |           |
| Tukey's multiple comparisons test           | Mean Diff.       | 95% CI of diff.              | Significant? | Summary   | Tukey's multiple comparisons test           | Mean Diff.       | 95% CI of diff.             | Significant? | Summary   |
| Recq4fl/+ vs. Recq4fl/fl                    | 8.461            | -8.747 to 25.67              | No           | ns        | Recq4fl/+ vs. Recq4fl/fl                    | 2.365            | -15.15 to 19.88             | No           | ns        |
| Recq4fl/+ vs. p53fl/fl                      | -7.041           | -24.25 to 10.17              | No           | ns        | Recq4fl/+ vs. p53fl/fl                      | -12.53           | -30.05 to 4.983             | No           | ns        |
| Recq4fl/+ vs. Recq4fl/fl p53fl/fl           | 7.298            | -9.910 to 24.51              | No           | ns        | Recq4fl/+ vs. Recq4fl/fl p53fl/fl           | 2.184            | -15.33 to 19.70             | No           | ns        |
| Recq4fl/fl vs. p53fl/fl                     | -15.5            | -33.64 to 2.638              | No           | ns        | Recq4fl/fl vs. p53fl/fl                     | -14.9            | -33.36 to 3.566             | No           | ns        |
| <b>Recq4fl/fl vs. Recq4fl/fl p53fl/fl</b>   | <b>-1.163</b>    | <b>-19.30 to 16.98</b>       | <b>No</b>    | <b>ns</b> | <b>Recq4fl/fl vs. Recq4fl/fl p53fl/fl</b>   | <b>-0.1805</b>   | <b>-18.64 to 18.28</b>      | <b>No</b>    | <b>ns</b> |
| p53fl/fl vs. Recq4fl/fl p53fl/fl            | 14.34            | -3.801 to 32.48              | No           | ns        | p53fl/fl vs. Recq4fl/fl p53fl/fl            | 14.72            | -3.746 to 33.18             | No           | ns        |
| Symbol                                      | P value          |                              |              |           |                                             |                  |                             |              |           |
| *                                           | 0.05             |                              |              |           |                                             |                  |                             |              |           |
| **                                          | 0.01             |                              |              |           |                                             |                  |                             |              |           |
| ***                                         | 0.001            |                              |              |           |                                             |                  |                             |              |           |
| ****                                        | 0.0001           |                              |              |           |                                             |                  |                             |              |           |
| ns                                          | not significant  |                              |              |           |                                             |                  |                             |              |           |

**A. RECQL4 (human; Chromosome 8: 145,736,672-145,743,200 reverse strand)**

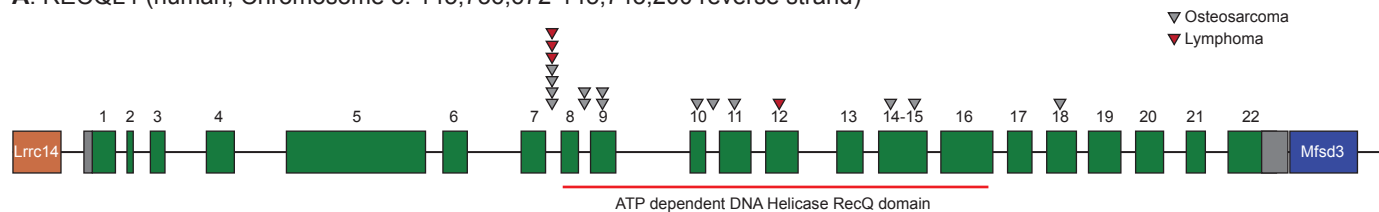

Rothmund-Thomson Syndrome associated tumour mutations (RTS); adapted from Eur J Hum Genet. 2009 Feb;17(2):151-8

**B. Recql4 Conditional Allele (C57BL/6-*Recql4*<sup>tm2272Arte</sup>)**

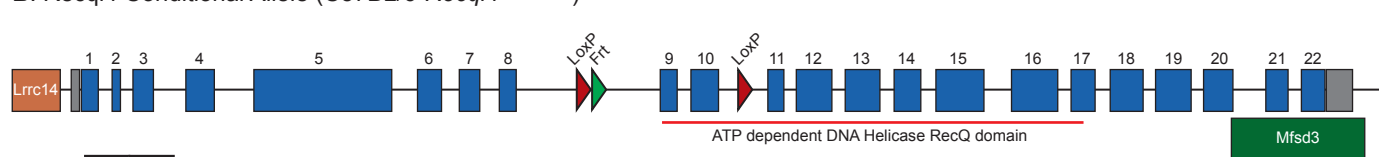

+ Cre

**C. *Recql4* Recombined KO allele**

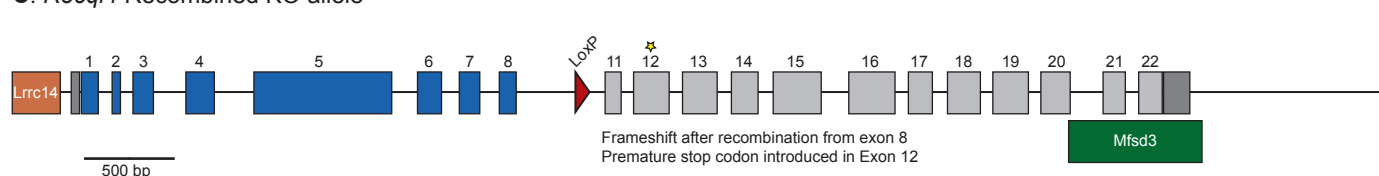

**D. *Rosa26-CreER*<sup>T2</sup>**

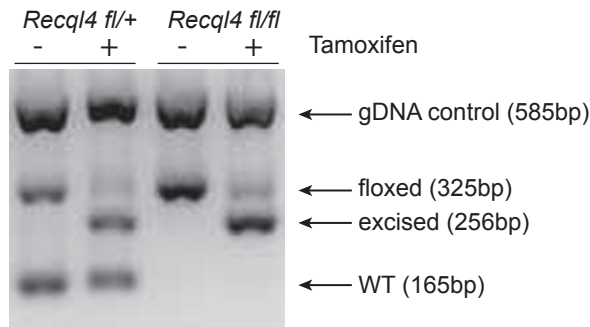

**E.**

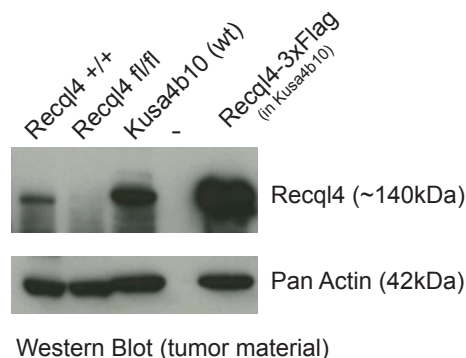

**Supplemental Figure 1. Outline of targeted allele and data from germ-line deleted allele analysis**

A. Human *Recql4* locus with mutations in RTS patients indicated

B. Mouse *Recql4* locus with inserted LoxP sites indicated. Exon 9 and 10 of mouse *Recql4* are flanked by LoxP elements

C. Recombined *Recql4* allele after Cre exposure. Frame shift predicted to introduce a stop codon in exon 12.

D. Genomic PCR showing recombination of the floxed allele to produce the excised product of the expected size.

E. Western blot of *Recql4* expression in tumours from Cre+ *Recql4*<sup>+/+</sup> and Cre+ *Recql4*<sup>fl/fl</sup> mice as indicated. Kusa4b10 endogenous control and *Recql4*-3xFlag tagged expressing Kusa4b10 used as a control. Tumour model will be described elsewhere in detail.

Reference: PubMed ID: 22815738 , GEO GSE ID: 34723

**NCBI Entrez Gene:** 79456

**1 probeset** on Affymetrix Mouse Genome 430 2.0 Array

| Probeset   | Gene   | Alignment                                 | Dynamic-range |
|------------|--------|-------------------------------------------|---------------|
| 1422922_at | Recql4 | chr15:76533990-76540978 (-), 99.62, q24.2 | 4.58          |

**Alignment:** chr15:76533990-76540978 (-), 99.62, q24.2

11939 Microarrays in GEO  
Analyzed

**Dynamic-range: 4.58**

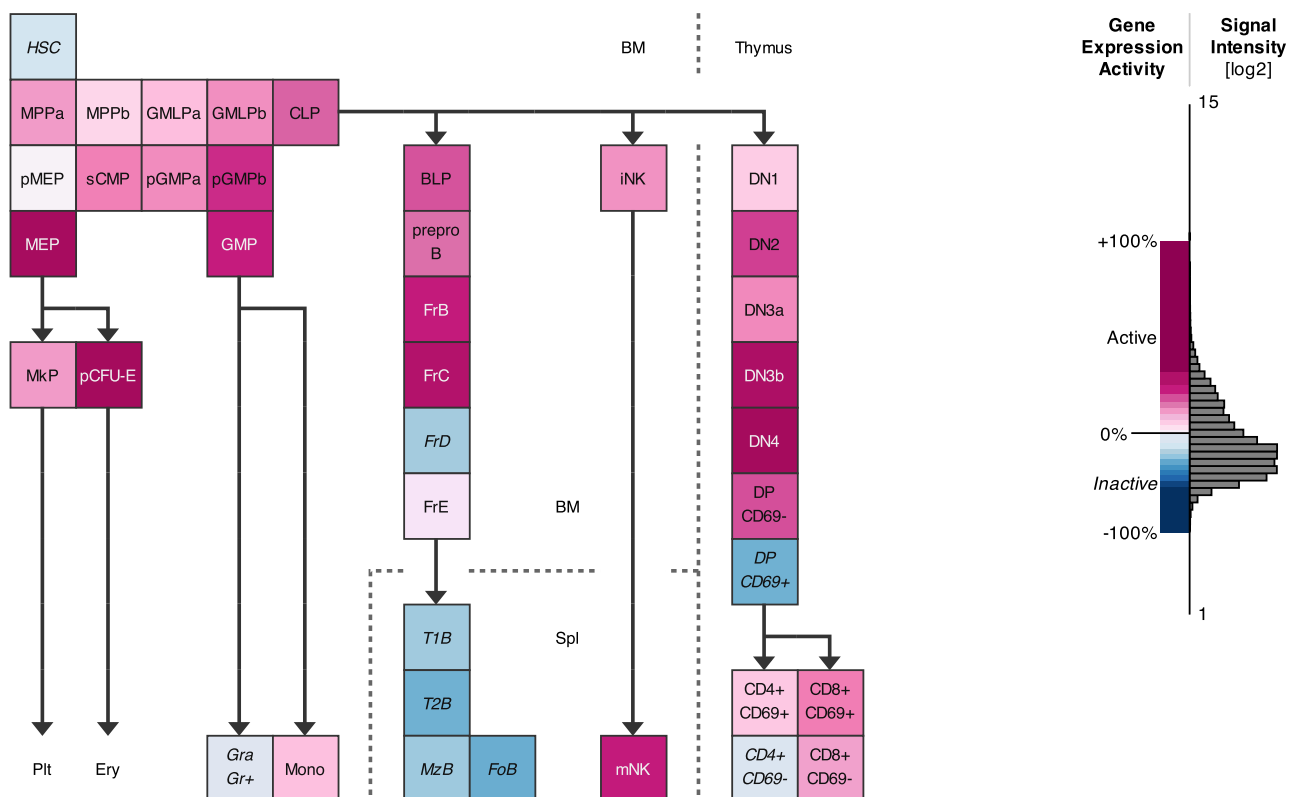

**Supplemental Figure 2.** Expression of Recq14 in murine hematopoietic cell subsets from Gene Expression Commons database. The expression of Recq14 in murine hematopoiesis based on data retrieved from the Gene Expression Commons database. Blue indicates low expression, red indicates highest expression.

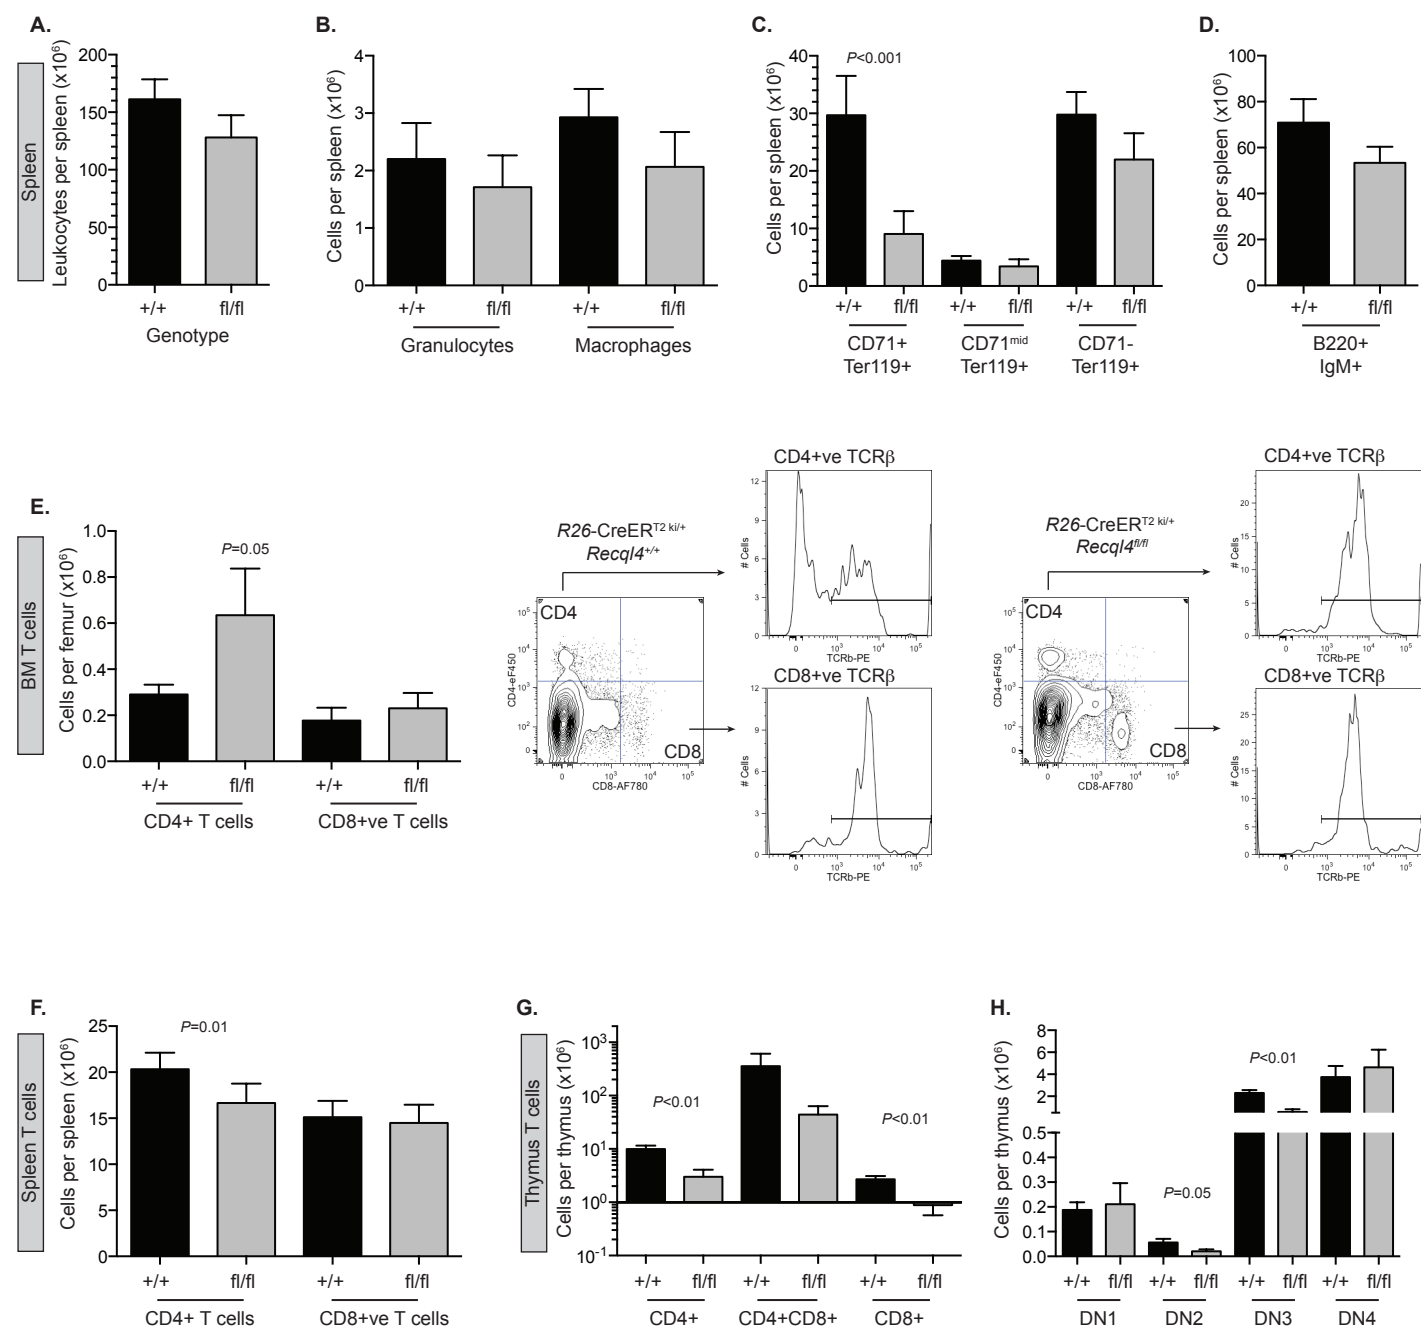**Supplemental Figure 3.** Spleen, bone marrow T cell and thymus data**A.** Spleen cellularity;**B.** Numbers of granulocytes and macrophages per spleen;**C.** Erythroid fractions based on CD71/Ter119 staining from the indicated genotype;**D.** B lymphocyte number per spleen .**E.** CD4 and CD8 mature T cells in the bone marrow and representative FACS plots of TCRβ staining on each population;**F.** T cells per spleen;**G.** Mature T cell subsets in the thymus;**H.** T cell progenitors in the thymus.Data expressed as mean  $\pm$  sem with students's T test statistic. \* $P < 0.05$ , \*\* $P < 0.001$  or P value as indicated on the figure;  $n > 5$  per genotype.

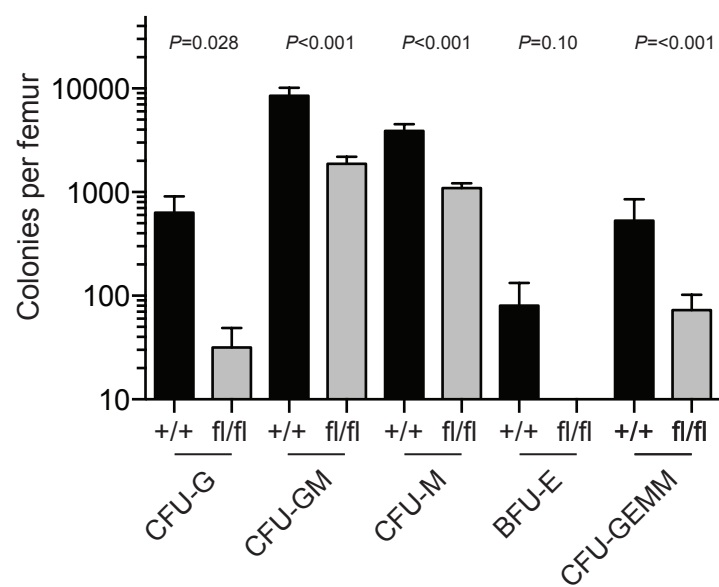

**Supplemental Figure 4.** Colony forming cell analysis per femur  
Frequency of each colony forming cell type per femur of the indicated genotypes.  
Data expressed as mean ± sem with students's T test statistic. \*P<0.05, \*\*P<0.001 or P value as indicated on the figure; n>5 per genotype.



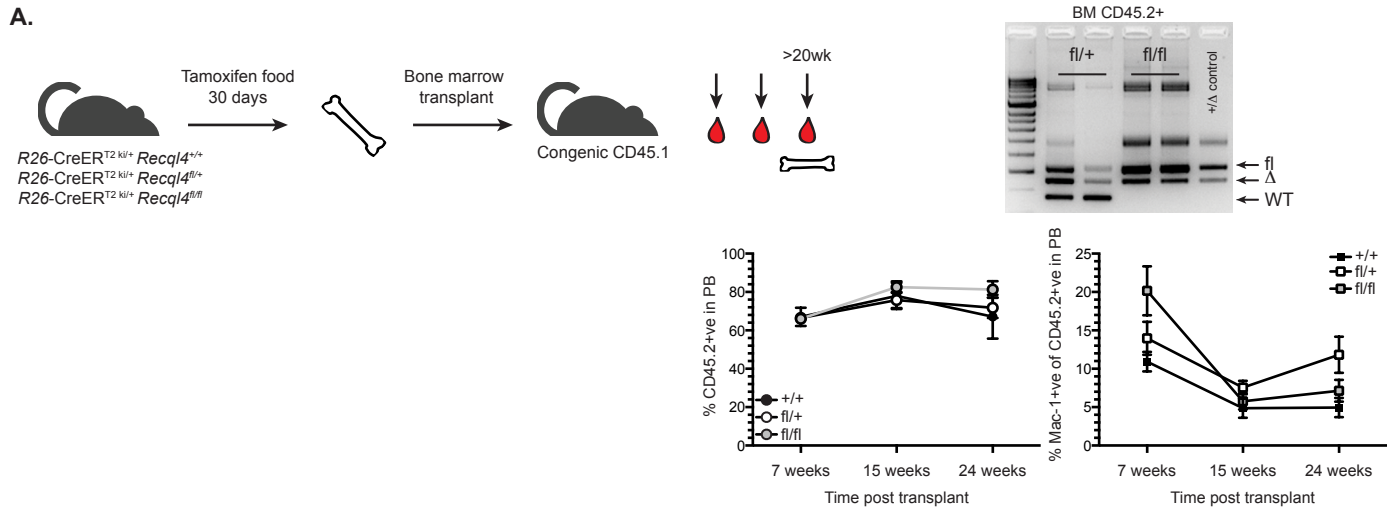

**Supplemental Figure 5.** Profound selection against *Recql4* deletion in hematopoietic stem cells.

(A) Schematic of bone marrow transplant strategy. Whole bone marrow was isolated from donors of each genotype treated with tamoxifen for 30 days. Donor cells were competitively transplanted with CD45.1/CD45.2 competitor bone marrow into CD45.1 recipients. Peripheral blood total chimerism (CD45.2+ve) and myeloid chimerism (Mac-1+ve) are shown from one of two independent experiments. At end point CD45.2 cells were isolated from the bone marrow and genomic PCR performed to determine the status of *Recql4*; n=5 recipients per genotype per experiment; experiment performed twice.

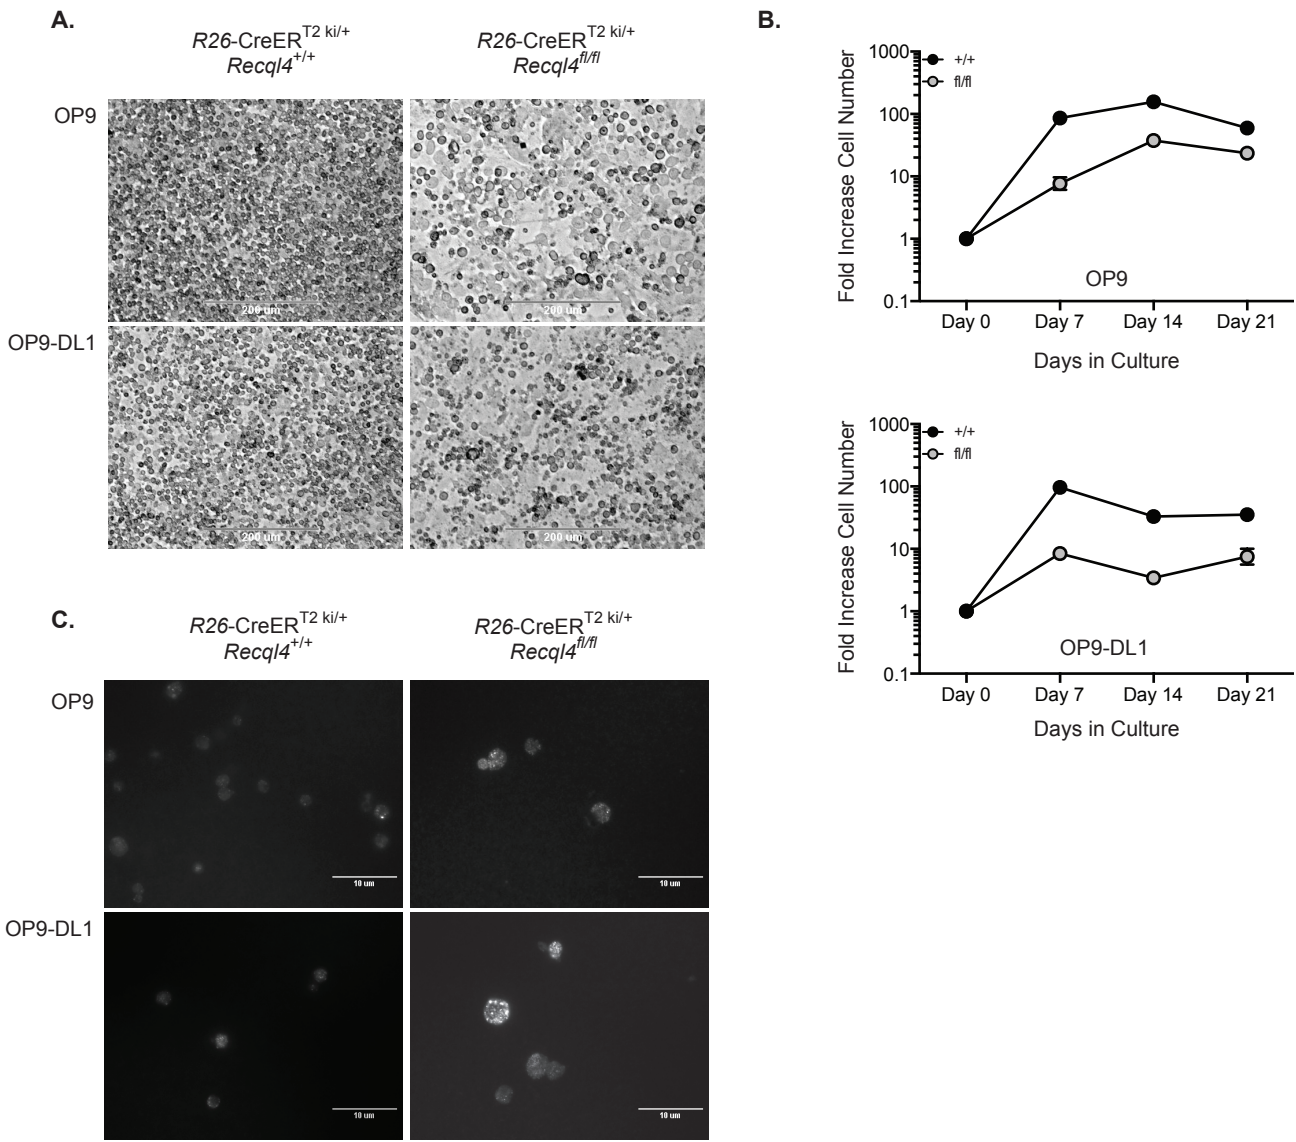

**Supplemental Figure 6.** OP9 and OP9-DL1 cultures

**A.** Representative phase contrast photos of hematopoietic cells of the indicated genotypes cultured on OP9 or OP9-DL1. Note the significantly larger cell size of the *Recql4* deficient cultures.

**B.** Fold change in cell numbers over the period of culture for cells cultured on OP9 and OP9-DL1 as indicated

**C.** Images of  $\gamma$ H2A.X foci in cells from the indicated genotype/culture system.

Scale bars as indicated.

Supplemental Figure 7

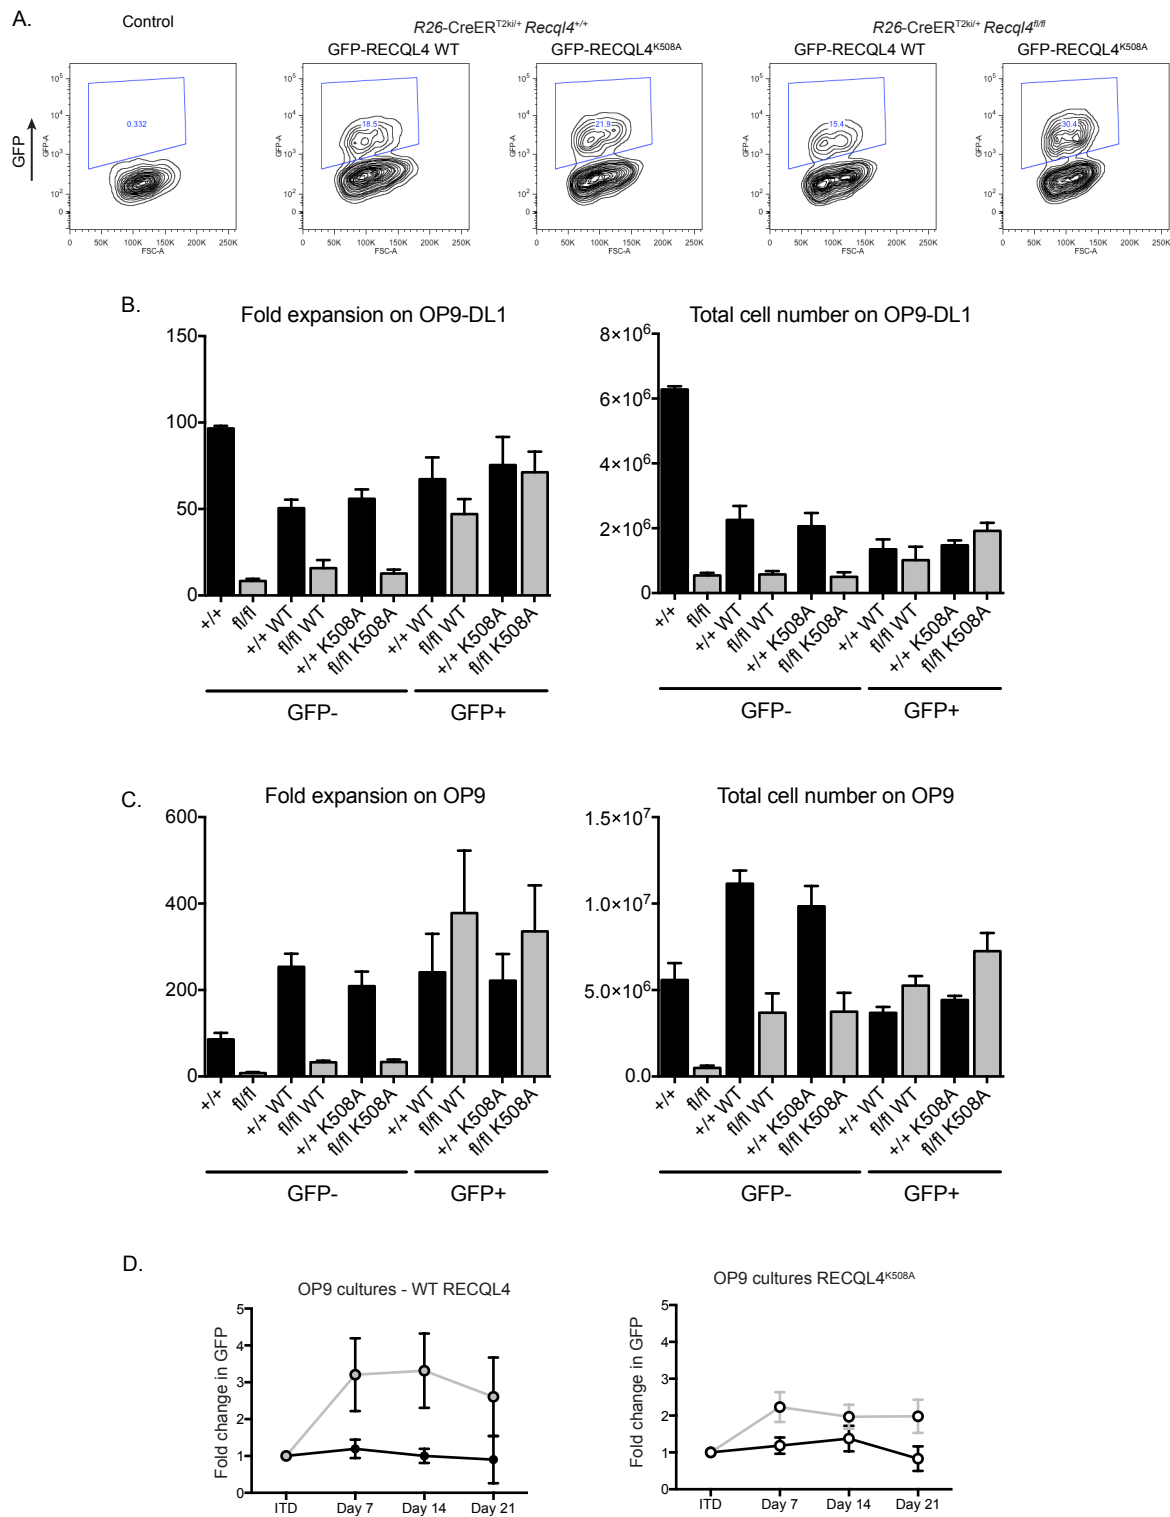

**Supplemental Figure 7. Retroviral complementation additional information**

**A.** Representative FACS plots showing GFP expression in virally transduced cells  
**B.** Fold expansion of cells of the indicated genotype on OP9-DL1 (T cell cultures) for GFP- (non rescued) or GFP+ (rescued)  
**C.** Fold expansion of cells of the indicated genotype on OP9 (B cell cultures) for GFP- (non rescued) or GFP+ (rescued)  
**D.** Fold change in GFP levels in OP9 cultures (B cells) for the EGFP-RECQL4 or EGFP-RECQL4<sup>K508A</sup>
